# Supplementary material for: On the photocatalysis evolution of heteroatom-doped Ag4M2 nanoclusters
Source: Royal Society of Chemistry journal article supplement (doi:10.1039/d1ra06388j), 2021-01-01
Supplement: d1ra06388j1.pdf [file d1ra06388j1.pdf]

## Supporting Information

### Experimental Section

**Synthesis of  $\text{Ag}_4\text{Pt}_2(\text{SPhMe}_2)_8$ .** 40 mg  $\text{H}_2\text{PtCl}_6 \cdot 6\text{H}_2\text{O}$  and 40 mg  $\text{AgNO}_3$  were dissolved in 3 mL  $\text{CH}_3\text{OH}$  by ultrasound. The solutions were poured into 15 mL  $\text{CH}_2\text{Cl}_2$  at 0 °C. After vigorously stirring for 10 min, 84  $\mu\text{L}$  2,4-dimethylbenzenethiol was added. After 30 min, 3 mL freshly prepared ice solution of 45 mg  $\text{NaBH}_4$  was added into the above solution quickly. The mixture was allowed to stirring overnight. After reaction, the crude product was washed with  $\text{CH}_3\text{OH}$  several times and extracted with  $\text{CH}_2\text{Cl}_2$ . The crude product was purified by PTLC to obtain  $\text{Ag}_4\text{Pt}_2(\text{SPhMe}_2)_8$ .

**Synthesis of  $\text{Ag}_4\text{Pd}_2(\text{SPhMe}_2)_8$ .** The same as  $\text{Ag}_4\text{Pt}_2(\text{SPhMe}_2)_8$ , except replacing  $\text{H}_2\text{PtCl}_6 \cdot 6\text{H}_2\text{O}$  with  $\text{Na}_2\text{PdCl}_4$ .

**Synthesis of  $\text{Ag}_4\text{Ni}_2(\text{SPhMe}_2)_8$ .** The same as  $\text{Ag}_4\text{Pt}_2(\text{SPhMe}_2)_8$ , except replacing  $\text{H}_2\text{PtCl}_6 \cdot 6\text{H}_2\text{O}$  with  $\text{Ni}(\text{NO}_3)_2 \cdot 6\text{H}_2\text{O}$ .

**Preparation of supported catalysts.** 3 mg  $\text{Ag}_4\text{M}_2(\text{SPhMe}_2)_8$  (M = Ni, Pd, Pt) and 150 mg  $\text{TiO}_2$  ( $\text{TiO}_2$  was pretreated at 400 °C for 5 h) were mixed in 1 mL  $\text{CH}_2\text{Cl}_2$  and then dried in air overnight.

**Catalytic reactions.** 50 mg  $\text{Ag}_4\text{M}_2(\text{SPhMe}_2)_8/\text{TiO}_2$  (M = Ni, Pd, Pt) was dispersed in 20 mL  $\text{H}_2\text{O}$  under stirring. Then 0.1 mL  $1 \text{ g} \cdot \text{L}^{-1}$  methyl orange or rhodamine B was added and the solution was irradiated with visible light using a Xe lamp. Samples from the solution were taken every 3 minutes and measured with UV-vis spectrometer.

**Characterization.** X-ray crystallography analysis of  $\text{Ag}_4\text{Pt}_2(\text{SPhMe}_2)_8$  was collected on a Bruker D8 VENTURE. UV-vis absorption spectra were carried out on a Shimadzu UV-1800 spectrophotometer at a medium sampling scan rate. Binding energies of the surface species on the catalysts were determined by X-ray photoelectron spectroscopy (XPS) (Thermo Scientific K-

Alpha) using a Al K $\alpha$  ( $h\nu = 1486.6$  eV) as the excitation source. Correction of the charge effect was made with the C 1s peak at 284.8 eV. The electrochemical impedance spectroscopy (EIS) measurement was performed on a CHI660B electrochemical workstation. A conventional three-electrode system was employed for the experiments. A platinum foil and a saturated Ag/AgCl electrode were used as counter electrode (CE) and reference electrode (RE), respectively. Working electrode (WE) was a glassy carbon. All the experiments were carried out in 1 mol·L<sup>-1</sup> Na<sub>2</sub>SO<sub>4</sub> at room temperature.

### **Computational Methods**

The three Au<sub>4</sub>M<sub>2</sub>(SPhMe<sub>2</sub>)<sub>8</sub> (M = Ni, Pd, and Pt) clusters were modelled at the density functional theory (DFT) level. The full atomistic structural model, comprising a monomer unit of the crystal structure of each Au<sub>4</sub>M<sub>2</sub> cluster, was used for all the calculations. All of the DFT calculations were carried out using the Gaussian09 software with the Perdew–Burke–Ernzerhof (PBE) exchange-correlation functionals<sup>S1</sup> and the aug-cc-pVDZ basis set and pseudopotentials.<sup>S2-S6</sup> Density of states analysis and the natural population analysis<sup>S7</sup> were performed to comprehend the electronic structures of the clusters.

**Table S1.** Binding energies of Ag, Ni, Pd, and Pt in Ag<sub>4</sub>M<sub>2</sub> from XPS analysis.

| Sample                          | Binding energy (eV)     |                         |                      |                      |                      |                      |                      |                      |
|---------------------------------|-------------------------|-------------------------|----------------------|----------------------|----------------------|----------------------|----------------------|----------------------|
|                                 | Ag<br>3d <sub>5/2</sub> | Ag<br>3d <sub>3/2</sub> | Ni 2p <sub>3/2</sub> | Ni 2p <sub>1/2</sub> | Pd 3d <sub>5/2</sub> | Pd 3d <sub>3/2</sub> | Pt 4f <sub>7/2</sub> | Pt 4f <sub>5/2</sub> |
| Ag <sub>4</sub> Ni <sub>2</sub> | 368.5                   | 374.5                   | 853.5                | 870.8                | -                    | -                    | -                    | -                    |
| Ag <sub>4</sub> Pd <sub>2</sub> | 368.7                   | 374.7                   | -                    | -                    | 337.0                | 342.3                | -                    | -                    |
| Ag <sub>4</sub> Pt <sub>2</sub> | 368.9                   | 374.9                   | -                    | -                    | -                    | -                    | 72.4                 | 75.7                 |

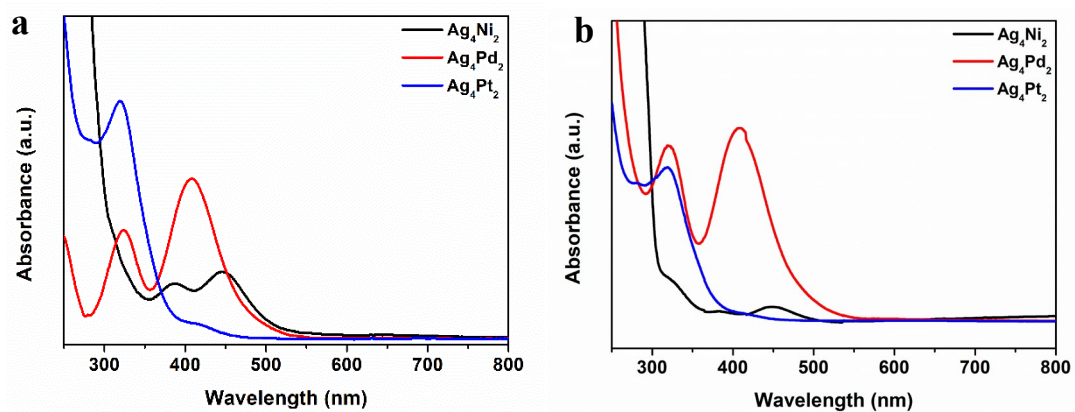

**Figure S1.** UV-vis absorption spectra of the  $\text{Ag}_4\text{Ni}_2$ ,  $\text{Ag}_4\text{Pd}_2$  and  $\text{Ag}_4\text{Pt}_2$  catalysts after photocatalytic degradation processes of (a) methyl orange and (b) rhodamine B. The cluster catalysts were dissolved in  $\text{CH}_2\text{Cl}_2$  for UV-vis measurement.

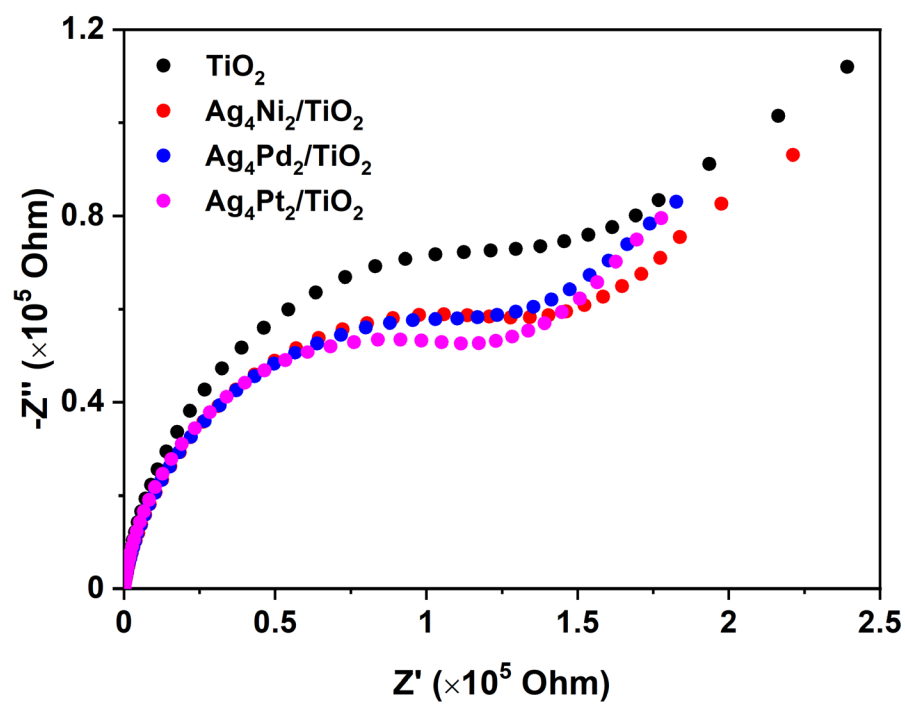

**Figure S2.** The electrochemical impedance spectroscopy (EIS) of the three  $\text{Ag}_4\text{M}_2/\text{TiO}_2$  clusters.

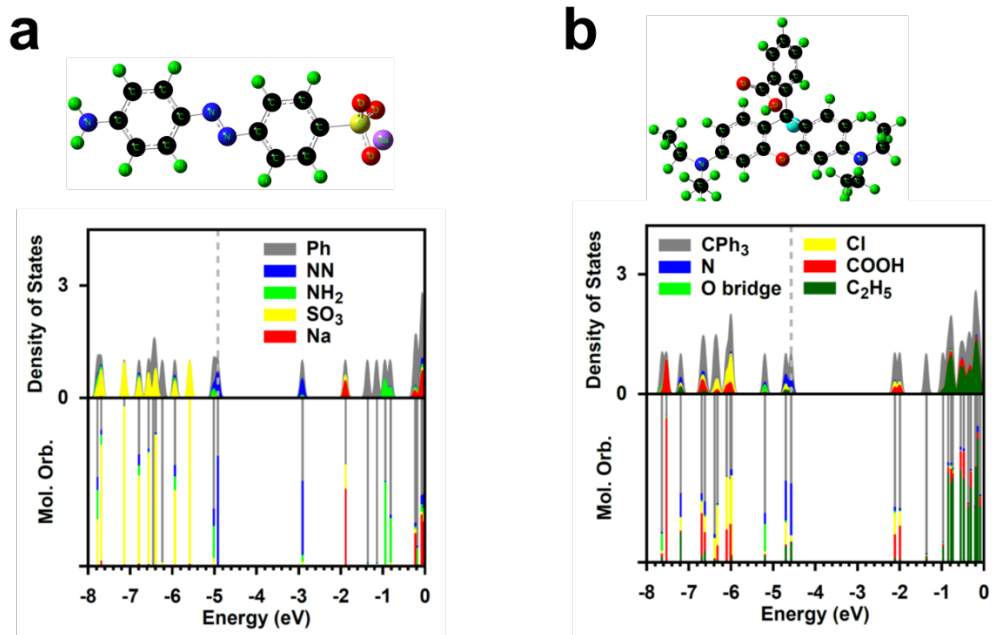

**Figure S3.** Molecular structure and PDOS for (a) methyl orange and (b) rhodamine B at the DFT PBE/Aug-cc-pVDZ level. Color code for the molecular structures: red = O, yellow = S, black = C, blue = N, green = H, cyan = Cl, and purple = Na.

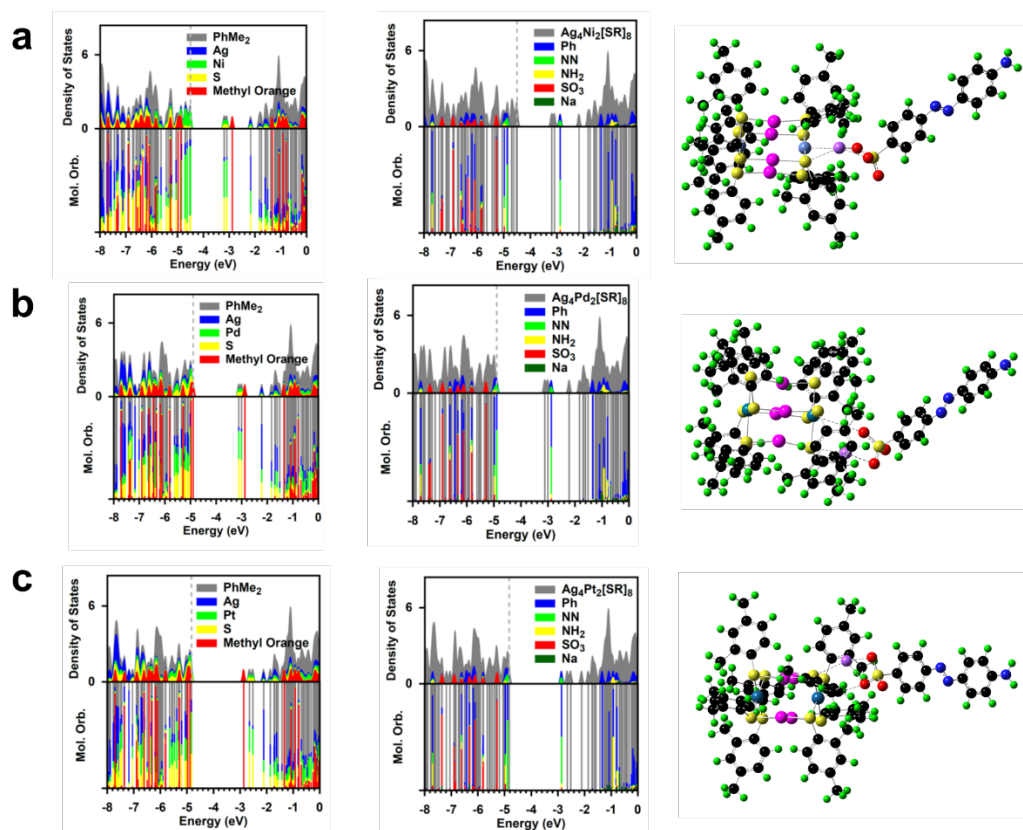

**Figure S4.** The molecular structure and PDOS for complex of methyl orange with  $\text{Ag}_4\text{M}_2(\text{SPhMe}_2)_8$  with M-S as the anchor point at the DFT PBE/Aug-cc-pVDZ level, M = (a) Ni, (b) Pd, and (c) Pt. The fragmental PDOSs for  $\text{Ag}_4\text{M}_2$  catalyst and methyl orange are shown in the left and middle panels, respectively, and the molecular structure is shown in the right panel.

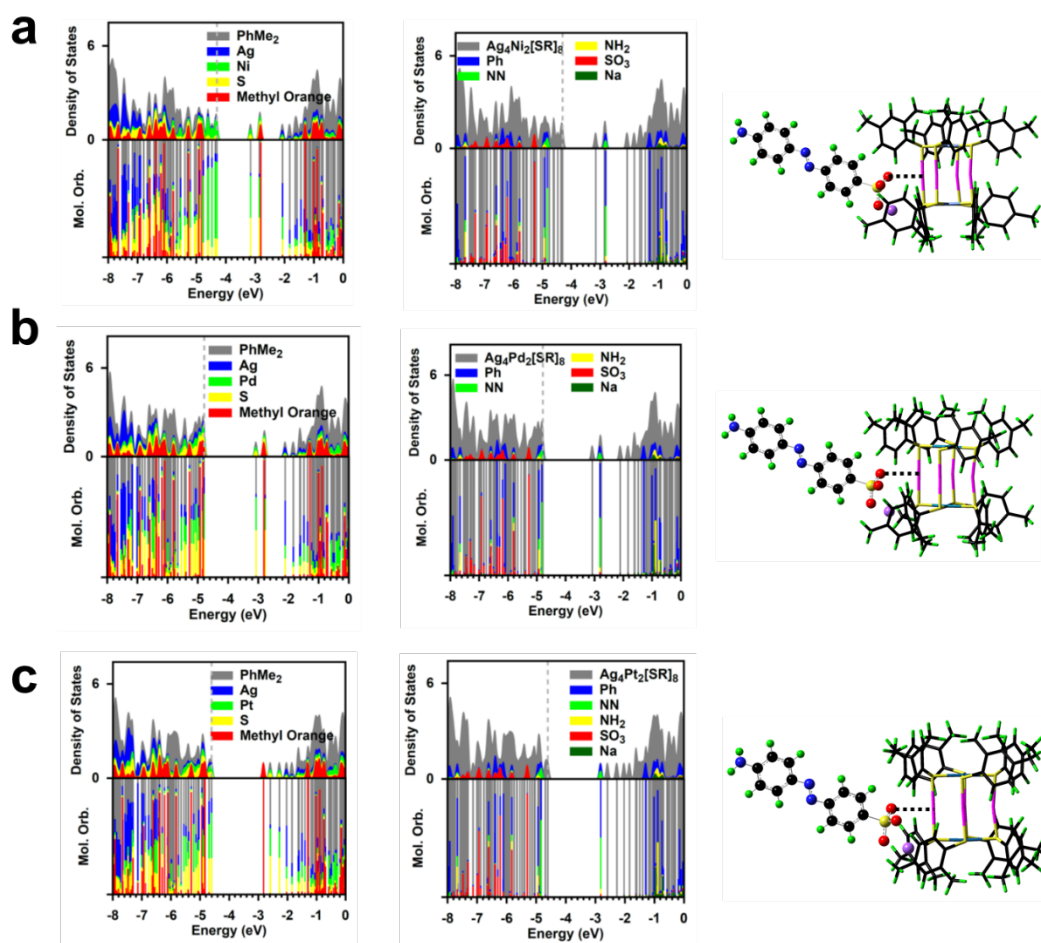

**Figure S5.** The molecular structure and PDOS for complex of methyl orange with  $\text{Ag}_4\text{M}_2(\text{SPhMe}_2)_8$  with Ag as the anchor point at the DFT PBE/Aug-cc-pVDZ level,  $\text{M} =$  (a) Ni, (b) Pd, and (c) Pt. The fragmental PDOSs for  $\text{Ag}_4\text{M}_2$  catalyst and methyl orange are shown in the left and middle panels, respectively, and the molecular structure is shown in the right panel.



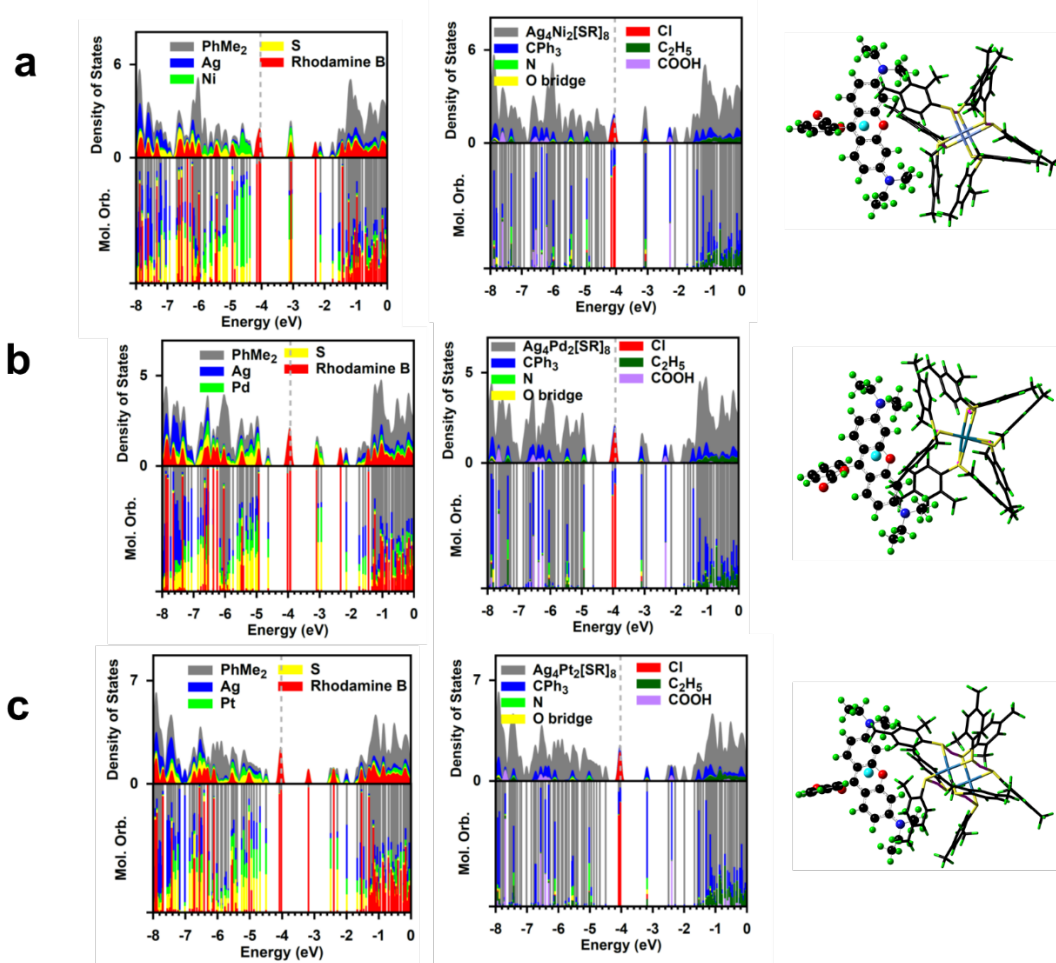

**Figure S6.** The molecular structure and PDOS for the complex of rhodamine B with  $\text{Ag}_4\text{M}_2(\text{SPhMe}_2)_8$  at the DFT PBE/Aug-cc-pVDZ level, M = (a) Ni, (b) Pd, and (c) Pt. The fragmental PDOSs for  $\text{Ag}_4\text{M}_2$  catalyst and rhodamine B are shown in the left and middle panels, respectively, and the molecular structure is shown in the right panel.

## Supporting References

- S1. J. P. Perdew, K. Burke and M. Ernzerhof, *Phys. Rev. Lett.*, **1996**, *77*, 3865.
- S2. D. Figgen, G. Rauhut, M. Dolg and H. Stoll, *J. Chem. Phys.*, **2005**, *311*, 227.
- S3. D. Figgen, K. A. Peterson, M. Dolg and H. Stoll, *J. Chem. Phys.*, **2009**, *130*, 164108.
- S4. K. A. Peterson and C. Puzzarini, *Theor. Chem. Acc.*, **2005**, *114*, 283.
- S5. T. H. Dunning, *J. Chem. Phys.* **1989**, *90*, 1007.
- S6. R. A. Kendall, T. H. Dunning and R. J. Harrison, *J. Chem. Phys.*, **1992**, *96*, 6796.
- S7. J. P. Foster and F. Weinhold, *J. Am. Chem. Soc.*, **1980**, *102*, 7211.
